# Supplementary material for: Functional differences between aggregated and dispersed insulin-producing cells
Source: PubMed Central journal article supplement — Diabetologia. 2013 Apr 19;56(7):1557–68. doi: 10.1007/s00125-013-2903-3 (PMC3671110; doi:10.1007/s00125-013-2903-3), 2013-04-19
Supplement: 125_2013_2903_MOESM1_ESM.pdf [file 125_2013_2903_MOESM1_ESM.pdf]

ESM table 1: List of primers

| Target             | Gene sequence            | Target             | Gene sequence          |
|--------------------|--------------------------|--------------------|------------------------|
| <i>Atp5g3</i> FW   | GAGCCCACGTCGCCTGTAAC     | <i>Ndufs6</i> FW   | ACGCGTGGGGTCAAGGGTCA   |
| <i>Atp5g3</i> RW   | TCGGATCAGAGCGGGGGTGC     | <i>Ndufs6</i> RW   | AACCCCGAAACCCCGTGCAG   |
| <i>Atp6v1c2</i> FW | CCTGGCTAACGGAGGTCTGAAGG  | <i>Ndufs7</i> FW   | CGGTGTGGTGTTCCTGTGCCA  |
| <i>Atp6v1c2</i> RW | GGCCAGTGTGTCCACCACGC     | <i>Ndufs7</i> RW   | CCACATAGCGGGGTTCGGGC   |
| <i>Cox11</i> FW    | GGCGGACTGTGGTGAACGCA     | <i>Ndufv1</i> FW   | CACGCTGAAGCCGCCCTTT    |
| <i>Cox11</i> RW    | GGCGCTTCCATGTCCCGAGA     | <i>Ndufv1</i> RW   | GTGCCCCCACGACGGCAAAT   |
| <i>Cox4i1</i> FW   | GGTTTCTCCGCCAAGTGGGAC    | <i>Ndufv2</i> FW   | AACCAGGGCCAAGGAGTGCC   |
| <i>Cox4i1</i> RW   | AGCTTCCAGCATGCCGAGGGA    | <i>Ndufv2</i> RW   | GCCTGCTTGCACACCAAAGCC  |
| <i>Cox6a2</i> FW   | AACCAAGCCCTTCGCCTGGG     | <i>Ndufv3</i> FW   | ACAGCAGCGGCACTGTCCAA   |
| <i>Cox6a2</i> RW   | GCCGGTGTGCAGAAGGCCAAT    | <i>Ndufv3</i> RW   | AGTCGTCAAGGGCCGGGAGG   |
| <i>Cox7a2l</i> FW  | GCTGCAGAAGTTTTTCCAGCCTCC | <i>Oxa11</i> FW    | TGCGACTCCTACGACCCACG   |
| <i>Cox7a2l</i> RW  | AAGGCTTCCGCGCTTCGCTT     | <i>Oxa11</i> RW    | CGTGGCAATGGCTCCCCACC   |
| <i>Cox8a</i> FW    | CTCGTCCGTGGTCGTTCCGC     | <i>Sdha</i> FW     | CGGGCAGGCTCATCGGTGTT   |
| <i>Cox8a</i> RW    | GCCGGCTTCGAGTGGACCTG     | <i>Sdha</i> RW     | TTCGCCCGTAGCCCCAGTA    |
| <i>Ndufa6</i> FW   | CTTCCTCGGCAAGATGGCGGC    | <i>Uqcrh</i> FW    | CAAACCGGCTCCCGACATGGG  |
| <i>Ndufa6</i> RW   | CCTCCGCTTGGCCTCGTTCA     | <i>Uqcrh</i> RW    | GTGACCGGGAAGACACGCGAT  |
| <i>Ndufa7</i> FW   | GGGCAAGACCTGCAGGCGAA     | <i>Hprt</i> FW     | GCCATTGCTGAGGCGGCGAG   |
| <i>Ndufa7</i> RW   | ACAACCTCCCGGCGGCCATC     | <i>Hprt</i> RW     | TCGCGGCAAAAAGCGGTCTGA  |
| <i>Ndufa8</i> FW   | TGGTCAACGGCTGTGCGCTG     | <i>Hsp90ab1</i> FW | CCTAGGCTTGCCGTGCGAGT   |
| <i>Ndufa8</i> RW   | TGCTGGCGGCAGTGACGAAA     | <i>Hsp90ab1</i> RW | ATGGTCTGCCCCGGACGGTGA  |
| <i>Ndufab1</i> FW  | AGACCCGGGGCTCTGCAGTC     | <i>Gapdh</i> FW    | ACCCAGCAAGGACACTGAGCAA |
| <i>Ndufab1</i> RW  | GGTGCGTCACTGTACTGGCGG    | <i>Gapdh</i> RW    | AGGGCTCCCTAGGCCCTCCTG  |
| <i>Ndufb10</i> FW  | GCCGCAGACCTCGCTCCCTAA    | <i>Actb</i> FW     | CACCCGCGAGCACAGCTTCT   |
| <i>Ndufb10</i> RW  | TCTCTCACGAGGGTCACGGGC    | <i>Actb</i> RW     | TTGCACATGCCGGAGCCGTT   |
| <i>Ndufc1</i> FW   | CCGTCCGTAGTGCTGCGCTC     |                    |                        |
| <i>Ndufc1</i> RW   | CGCCACGGACAGTCCAAC       |                    |                        |
