# Supplementary material for: Functional differences between aggregated and dispersed insulin-producing cells
Source: PubMed Central journal article supplement — Diabetologia. 2013 Apr 19;56(7):1557–68. doi: 10.1007/s00125-013-2903-3 (PMC3671110; doi:10.1007/s00125-013-2903-3), 2013-04-19
Supplement: 125_2013_2903_MOESM2_ESM.pdf [file 125_2013_2903_MOESM2_ESM.pdf]

ESM Fig 1

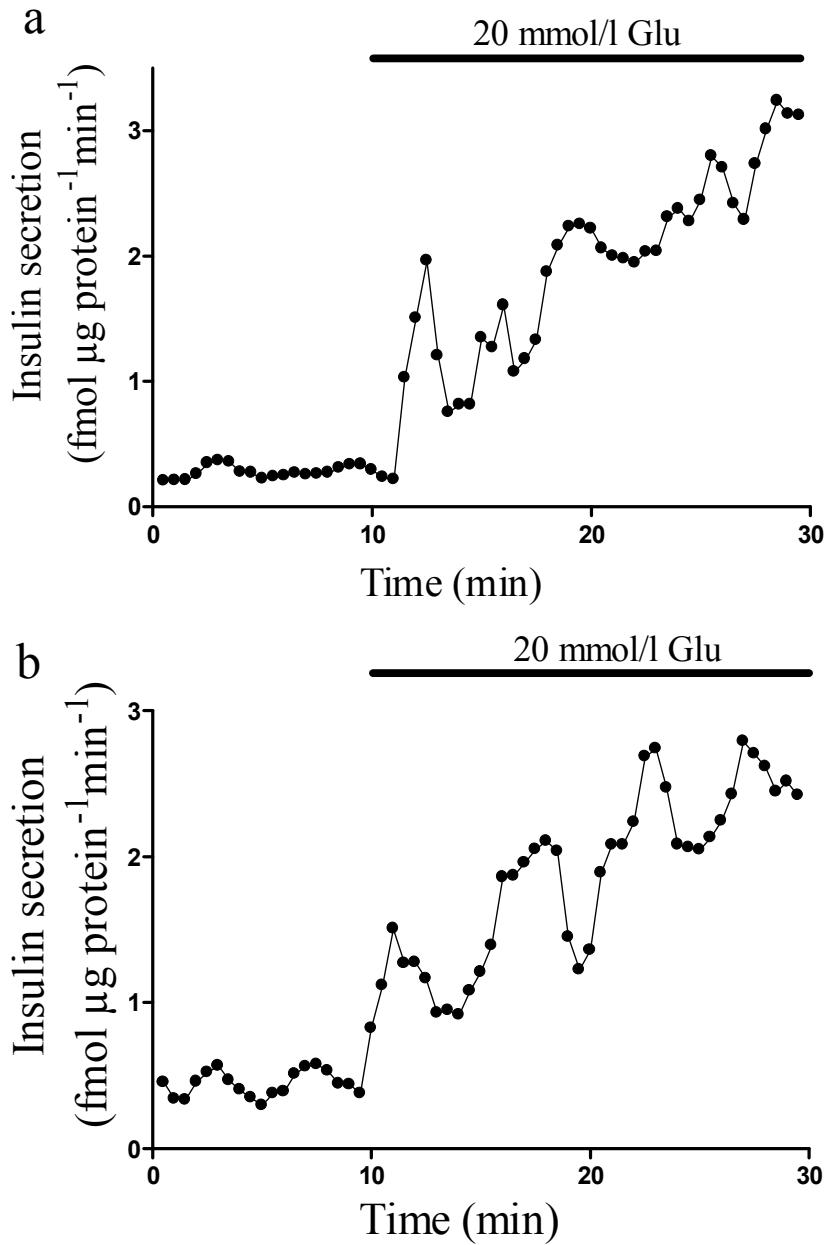

ESM Fig 1. Insulin secretion from an individual MIN6 pseudoislet (a) and a human islet (b) perfused in the presence of 2 and 20 mmol/l glucose. Samples of perfusate were collected every 30 seconds, analyzed and normalized to protein. Results are representative of three separate experiments.
