# Supplementary material for: Functional differences between aggregated and dispersed insulin-producing cells
Source: PubMed Central journal article supplement — Diabetologia. 2013 Apr 19;56(7):1557–68. doi: 10.1007/s00125-013-2903-3 (PMC3671110; doi:10.1007/s00125-013-2903-3), 2013-04-19
Supplement: 125_2013_2903_MOESM3_ESM.pdf [file 125_2013_2903_MOESM3_ESM.pdf]

ESM Fig 2

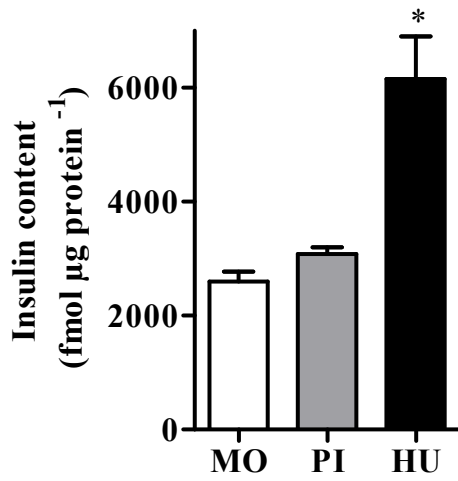

ESM Fig 2. Insulin content in MIN6 monolayers (white bars), MIN6 pseudoislets (gray bars) and human islets (black bars). Insulin was measured and normalized to protein. Results are means  $\pm$  SEM of five separate experiments. \* $P < 0.05$  compared to monolayers and pseudoislets.
