# Supplementary material for: Functional differences between aggregated and dispersed insulin-producing cells
Source: PubMed Central journal article supplement — Diabetologia. 2013 Apr 19;56(7):1557–68. doi: 10.1007/s00125-013-2903-3 (PMC3671110; doi:10.1007/s00125-013-2903-3), 2013-04-19
Supplement: 125_2013_2903_MOESM4_ESM.pdf [file 125_2013_2903_MOESM4_ESM.pdf]

ESM Fig 3

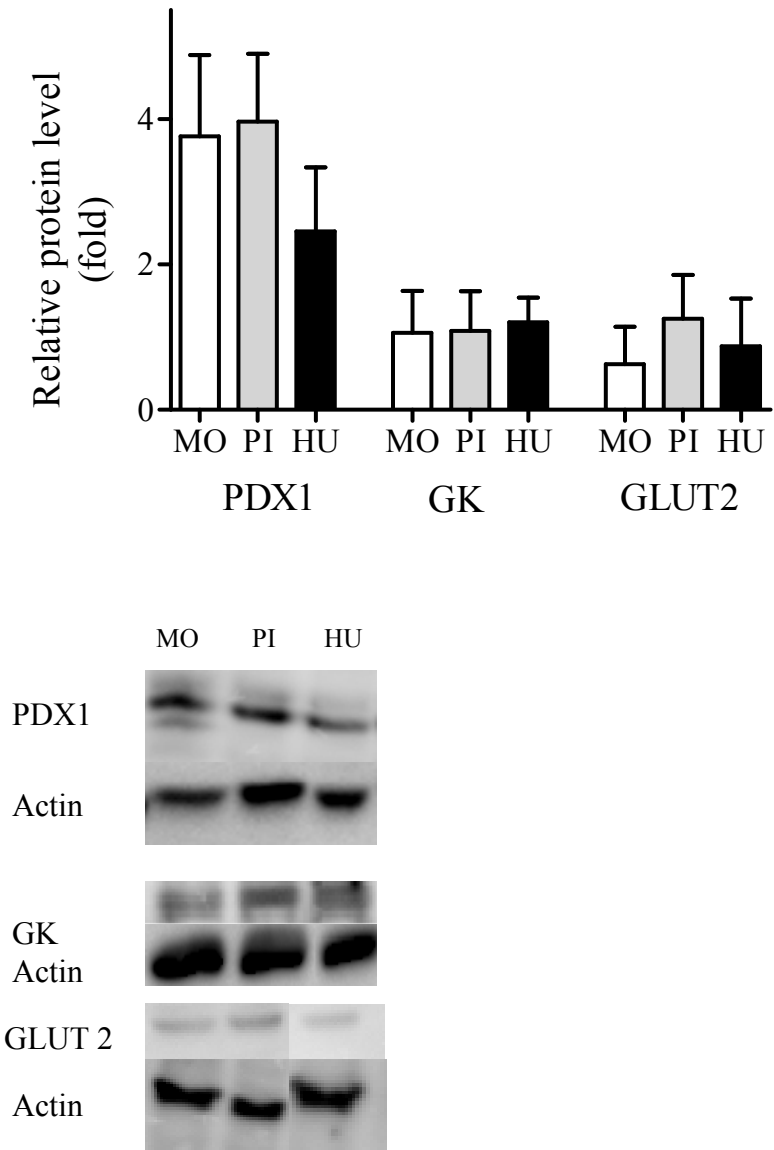

ESM Fig 3. Expression of beta-cell proteins PDX1, glucokinase (GK) and GLUT2 in MIN6 monolayers (white bars), MIN6 pseudoislets (gray bars) and human islets (black bars). Proteins were measured by western blotting and normalized to actin. Results are means  $\pm$  SEM of five separate experiments.
