# Supplementary material for: Functional differences between aggregated and dispersed insulin-producing cells
Source: PubMed Central journal article supplement — Diabetologia. 2013 Apr 19;56(7):1557–68. doi: 10.1007/s00125-013-2903-3 (PMC3671110; doi:10.1007/s00125-013-2903-3), 2013-04-19
Supplement: 125_2013_2903_MOESM5_ESM.pdf [file 125_2013_2903_MOESM5_ESM.pdf]

ESM Fig 4

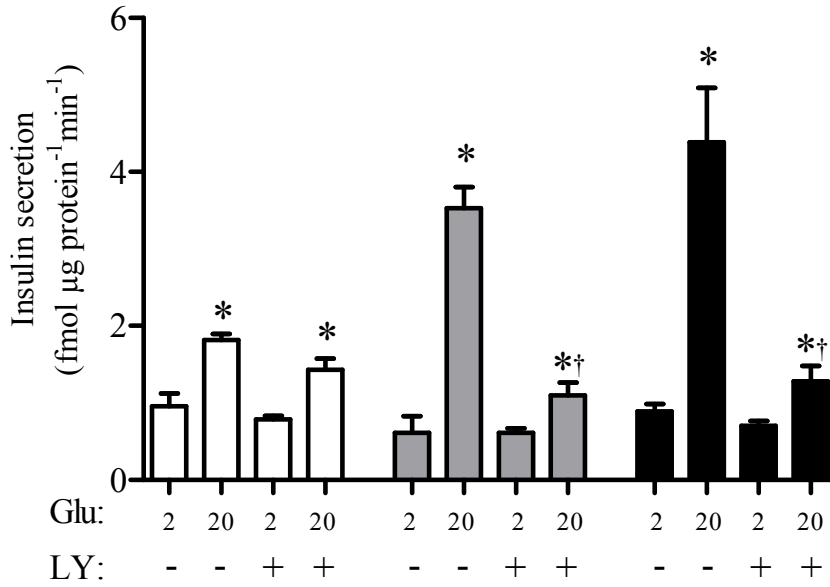

ESM Fig 4: Glucose-stimulated insulin secretion from MIN6 monolayers (white bars), MIN6 pseudoislets (gray bars) and human islets (black bars) in the presence of the PI3K inhibitor LY294002 (LY). Insulin released to the media was measured and normalized to protein. Results are means  $\pm$  SEM of five separate experiments. \* $P < 0.05$  compared to 2 mmol/l glucose and  $^{\dagger}P < 0.05$  compared to 20 mmol/l glucose.
